# Supplementary material for: Kinetics and mechanism of PPh3 oxygenation with 3O2 catalyzed by a 1,3,2-oxazaphosphole as flavin mimic
Source: Royal Society of Chemistry journal article supplement (doi:10.1039/c4ra01320d), 2014-01-01
Supplement: c4ra01320d1.pdf [file c4ra01320d1.pdf]

Supplementary Information to the Paper

**Kinetics and mechanism of PPh<sub>3</sub> oxygenation with <sup>3</sup>O<sub>2</sub> catalyzed by a 1,3,2-oxazaphosphole as flavin mimic.**

István Bors, József Kaizer and Gábor Speier\*

*Department of Chemistry, University of Pannonia, H-8200 Veszprém, Hungary*  
[speier@almos.uni-pannon.hu](mailto:speier@almos.uni-pannon.hu)

**Kinetics**

The method of Hiatt et al.<sup>1</sup> was adopted. The  $\lambda_{\max}$  value for PPh<sub>3</sub> is 260 ( $\epsilon = 14000 \text{ M}^{-1}\text{cm}^{-1}$ ) nm. That of OPPh<sub>3</sub> is 260 nm with  $\epsilon = 2200 \text{ M}^{-1}\text{cm}^{-1}$ . Because of the almost identical  $\lambda_{\max}$  of PPh<sub>3</sub> and OPPh<sub>3</sub> correction have to be made according to the following:

$$A = (\epsilon_{\text{PPh}_3} [\text{PPh}_3] + \epsilon_{\text{OPPh}_3} [\text{OPPh}_3]) l$$

$$[\text{PPh}_3] = [\text{PPh}_3]_0 - [\text{OPPh}_3]$$

where A is absorbance measured, l the pathway of the cuvette and  $[\text{PPh}_3]_0$  the starting concentration in  $\text{mol dm}^{-3}$ .

1 R. Hiatt, R. J. Smythe and C. McColeman, *Can. J. Chem.* 1971, **49**, 1707-1711.

**Figure 1.** The dioxygen uptake of 2,2-dihydro-2,2,2-triphenylphenanthro [9,10-d]1,3,2λ<sup>5</sup>-oxazaphosphole (**3**) 1.06 mmol in 10 ml acetonitrile at 20°C and 1 bar O<sub>2</sub> pressure.

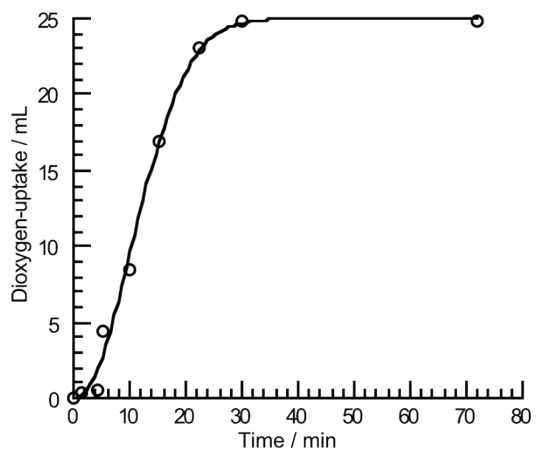

**Figure 2.** The dependence of O<sub>2</sub>-uptake of **3** on the solvents. Conditions: Solvent 20 mL, 1,3,2-oxazaphosphole (**3**) 0.25 mmol, 25°C, 1 bar O<sub>2</sub> pressure.

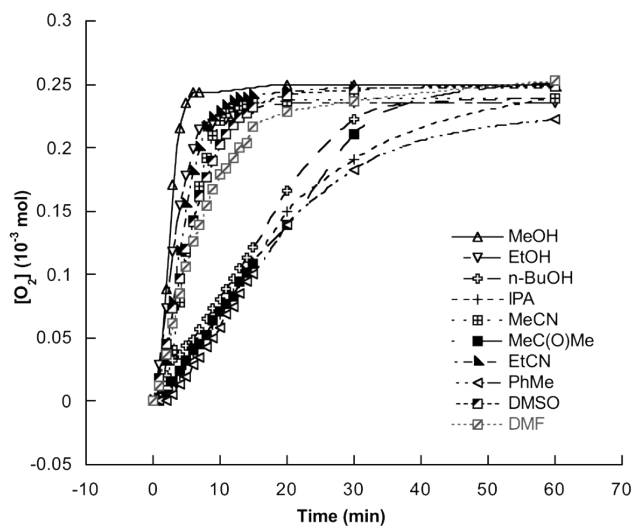

**Figure 3.** The time course of the PPh<sub>3</sub> oxygenation followed by UV-Vis spectroscopy at 260 nm, 80°C, 1 bar O<sub>2</sub> pressure in DMF 20 mL.

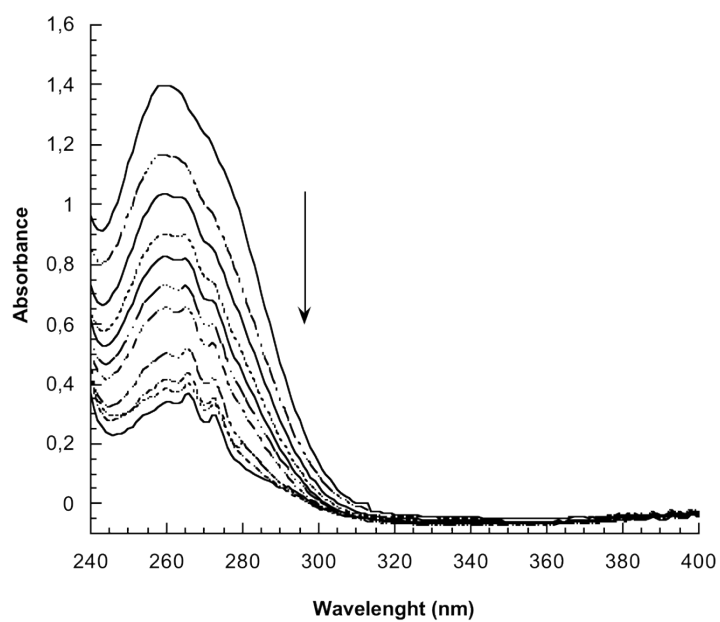

**Figure 4.** Plot of reaction rate vs. the initial concentration of  $\text{PPh}_3$ .

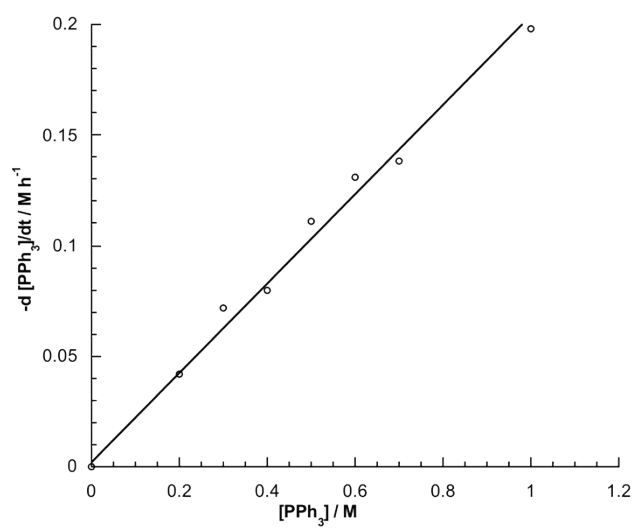

**Figure 5.** The dependence of the reaction rate of the catalyst concentration [3].

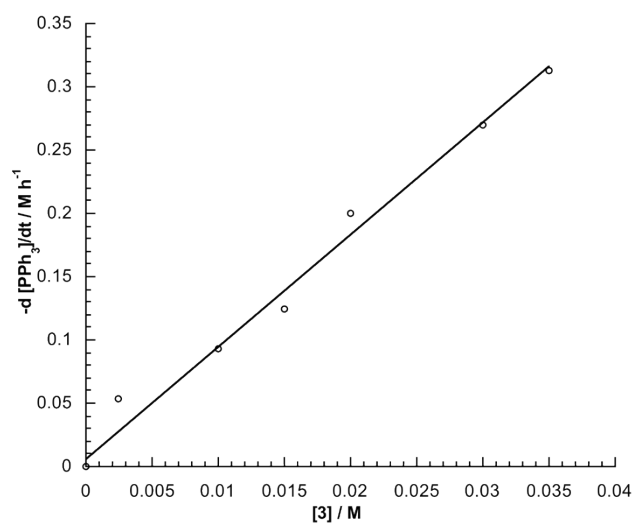

**Figure 6.** The dependence of the reaction rate on the dioxygen concentration.

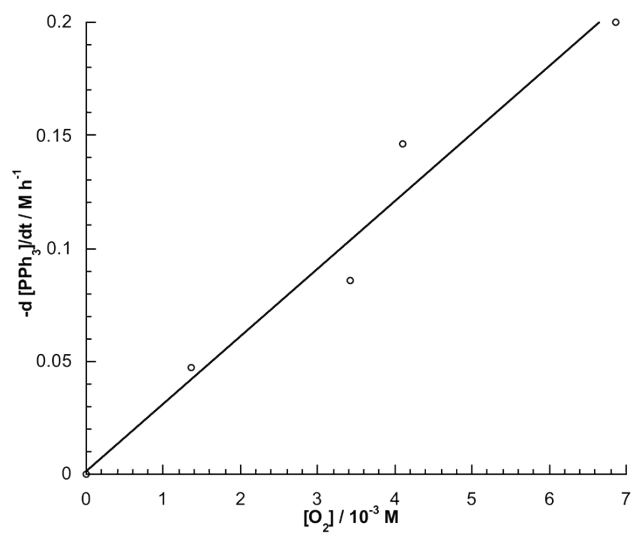

**Figure 7.** The IR spectra of the reaction product  $\text{O=PPh}_3$  using  $^{16}\text{O}_2$  or  $^{18}\text{O}_2$ .

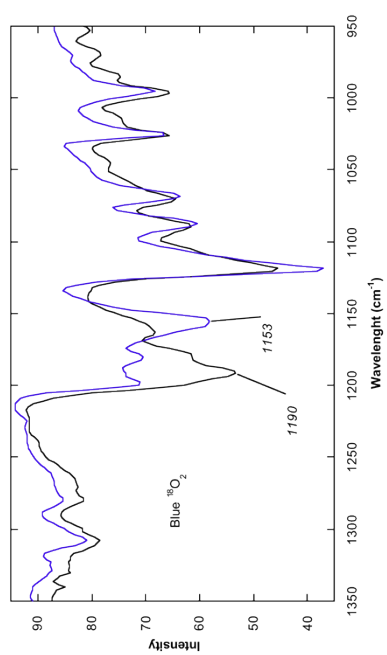



**Figure 8.** UV-Vis spectra of the reaction of **7** with  $\text{KO}_2$ .

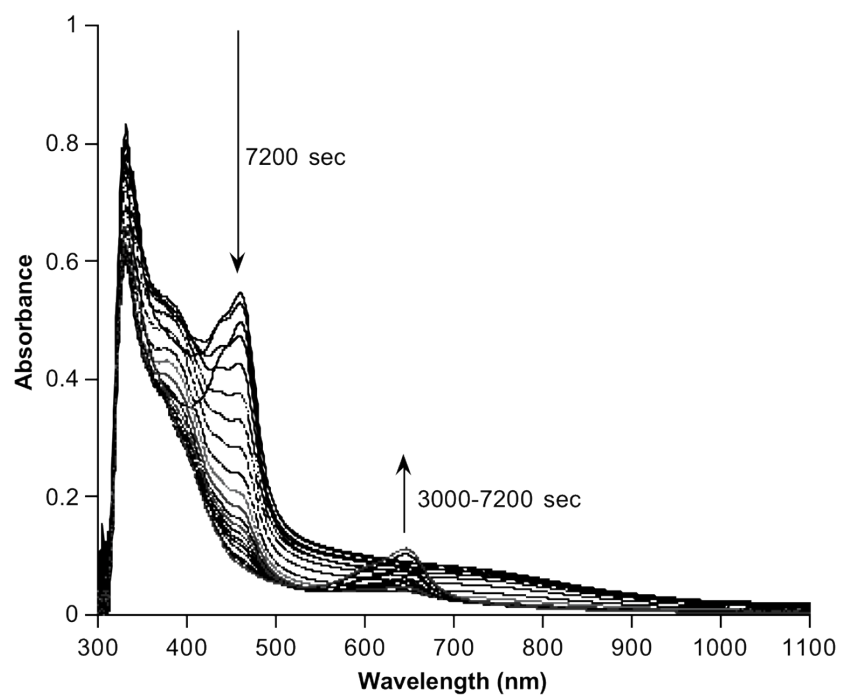

**SFigure 9.** The effect of added  $\text{NEt}_3$  on the reaction rate.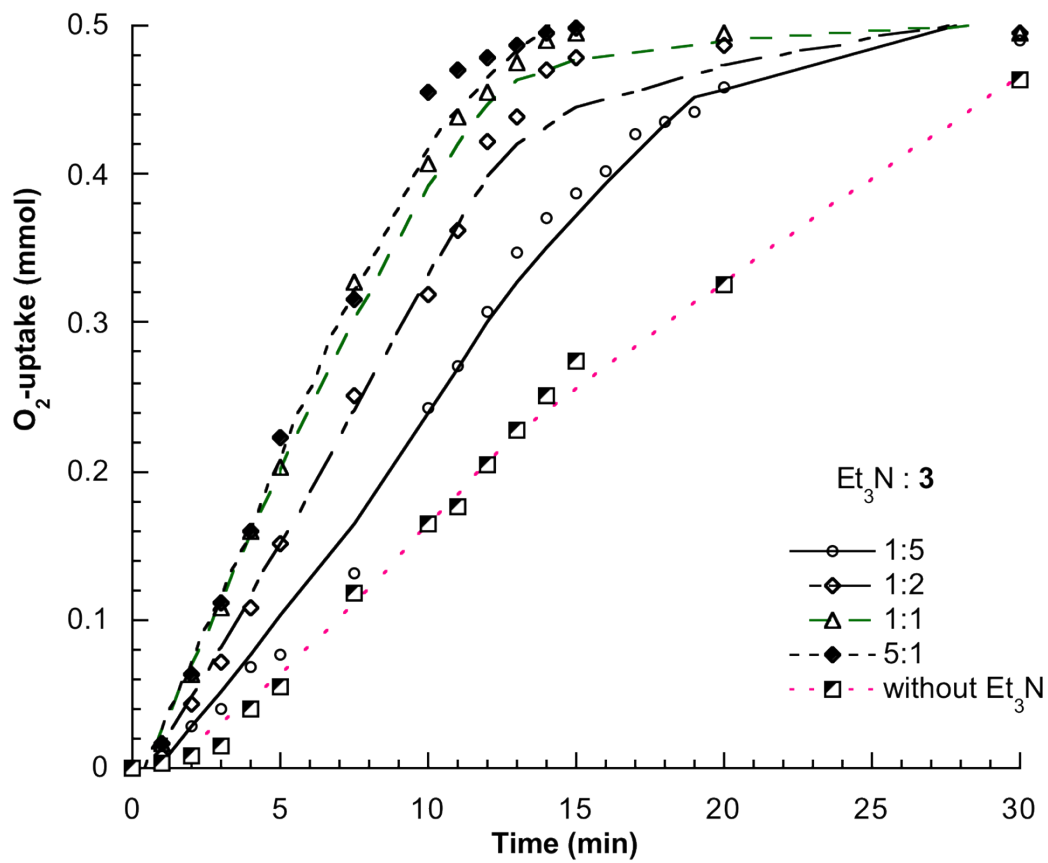

**SFigure 10.** The IR spectra of the reaction product (red) of 9,10-phenanthrenequinone oxim (green) and  $\text{PPh}_3$ . The 9,10-phenanthrenequinone imine (black) is also shown. The  $\nu(\text{P}=\text{O})$  vibrations of  $\text{OPPh}_3$  are not shown.

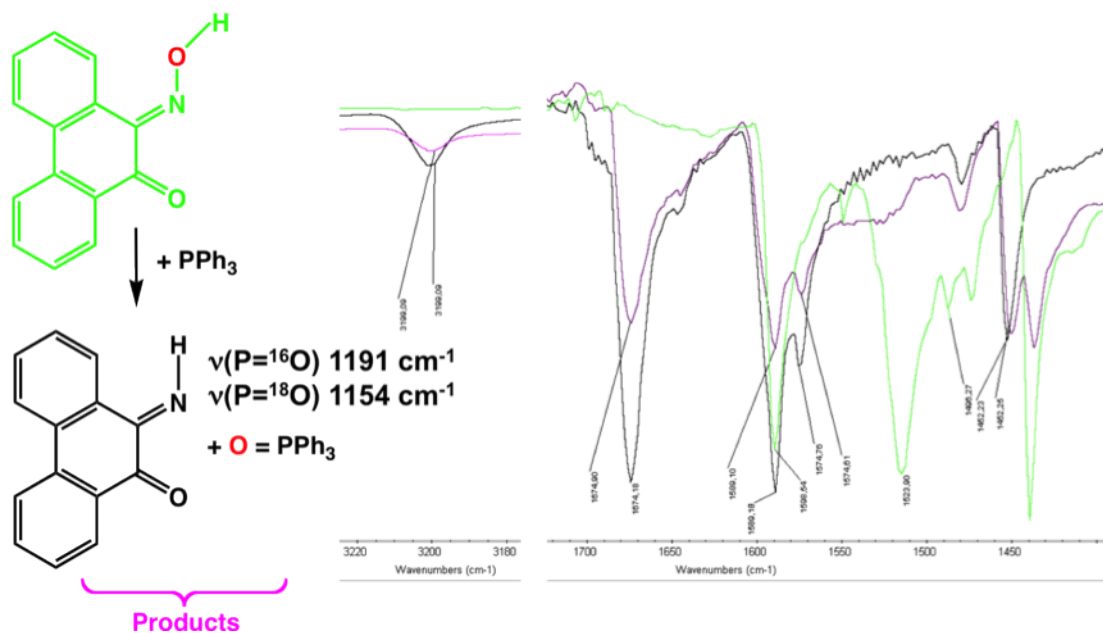

**SFigure 11.** The Arrhenius plot.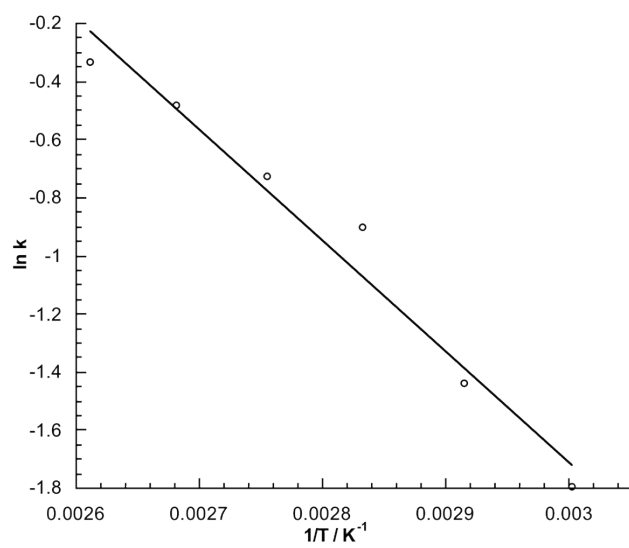

**Figure 12.** The Eyring plot.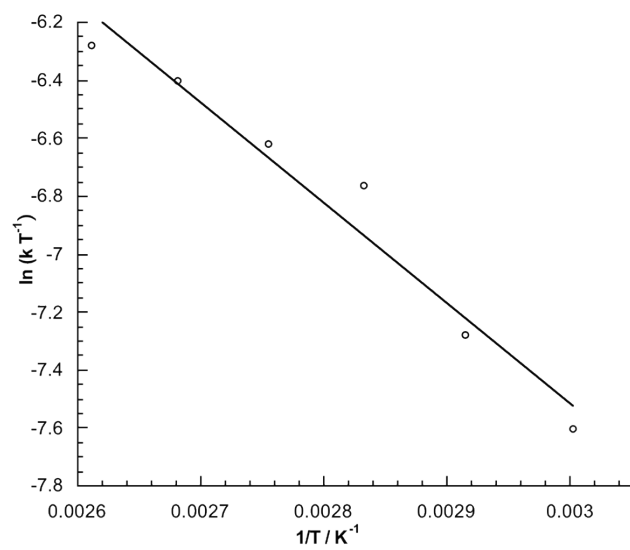

**STable 1.** Summary of the kinetic data.

|              | <b>T</b> | <b>[O<sub>2</sub>]</b> | <b>[PPh<sub>3</sub>]</b> | <b>[cat]</b>         | <b>d[PPh<sub>3</sub>]/dt</b>        | <b>k<sub>obs</sub></b>                              |
|--------------|----------|------------------------|--------------------------|----------------------|-------------------------------------|-----------------------------------------------------|
| <b>Entry</b> | (K)      | (10 <sup>-3</sup> M)   | (M)                      | (10 <sup>-2</sup> M) | (10 <sup>-5</sup> s <sup>-1</sup> ) | (10 <sup>-1</sup> M <sup>-2</sup> s <sup>-1</sup> ) |
| 1            | 353      | 6.86                   | 0.2                      | 2.00                 | 5.44±0.18                           | 3.97±0.13                                           |
| 2            | 353      | 6.86                   | 0.3                      | 2.00                 | 5.67±0.56                           | 4.13±0.41                                           |
| 3            | 353      | 6.86                   | 0.4                      | 2.00                 | 6.14±0.15                           | 4.47±0.11                                           |
| 4            | 353      | 6.86                   | 0.5                      | 2.00                 | 5.56±0.22                           | 4.05±0.16                                           |
| 5            | 353      | 6.86                   | 0.6                      | 2.00                 | 6.03±0.12                           | 4.39±0.09                                           |
| 6            | 353      | 6.86                   | 0.7                      | 2.00                 | 5.28±0.07                           | 3.85±0.05                                           |
| 7            | 353      | 6.86                   | 1.0                      | 2.00                 | 5.50±0.20                           | 4.01±0.14                                           |
| 8            | 353      | 6.86                   | 0.5                      | 1.00                 | 2.58±0.07                           | 3.77±0.10                                           |
| 9            | 353      | 6.86                   | 0.5                      | 1.50                 | 3.44±0.10                           | 3.35±0.10                                           |
| 10           | 353      | 6.86                   | 0.5                      | 3.00                 | 7.47±0.75                           | 3.63±0.37                                           |
| 11           | 353      | 6.86                   | 0.5                      | 3.50                 | 8.92±0.22                           | 3.71±0.09                                           |
| 12           | 353      | 1.37                   | 0.5                      | 2.00                 | 1.31±0.19                           | 4.77±0.70                                           |
| 13           | 353      | 3.42                   | 0.5                      | 2.00                 | 2.39±0.11                           | 3.49±0.16                                           |
| 14           | 353      | 4.10                   | 0.5                      | 2.00                 | 3.78±0.19                           | 4.61±0.23                                           |
| *            |          |                        |                          |                      |                                     | <b>3.91±0.08</b>                                    |
| 15           | 333      | 6.20                   | 0.5                      | 2.00                 | 2.06±0.07                           | 1.66±0.06                                           |
| 16           | 343      | 6.56                   | 0.5                      | 2.00                 | 3.11±0.15                           | 2.37±0.11                                           |
| 17           | 363      | 7.48                   | 0.5                      | 2.00                 | 7.22±0.53                           | 4.83±0.35                                           |
| 18           | 373      | 7.70                   | 0.5                      | 2.00                 | 9.53±0.40                           | 6.19±0.26                                           |
| 19           | 383      | 7.45                   | 0.5                      | 2.00                 | 10.67±0.70                          | 7.16±0.47                                           |

\*Mean value of the kinetic constant  $k_{\text{obs}}$  and its standard deviations  $\sigma(k_{\text{obs}})$  were calculated as  $k_{\text{obs}} = (\sum_i w_i k_i / \sum_i w_i)$  and  $\sigma(k_{\text{obs}}) = (\sum_i w_i (k_i - k_{\text{obs}})^2 / (n-1) \sum_i w_i)^{1/2}$ , where  $w_i = 1/\sigma_i^2$ .

### Activation parameters

$$E_a = 31.61 \pm 2.86 \text{ kJ mol}^{-1}$$

$$\Delta H^\ddagger = 28.67 \pm 2.88 \text{ kJ mol}^{-1}$$

$$\Delta S^\ddagger = -174 \pm 8 \text{ J mol}^{-1} \text{ K}^{-1}$$
