# Supplementary material for: Kinetics and mechanism of PPh3 oxygenation with 3O2 catalyzed by a 1,3,2-oxazaphosphole as flavin mimic
Source: Royal Society of Chemistry journal article supplement (doi:10.1039/c4ra01320d), 2014-01-01
Supplement: c4ra01320d2.pdf [file c4ra01320d2.pdf]

Supplementary Information to the Paper

**Kinetics and mechanism of PPh<sub>3</sub> oxygenation with <sup>3</sup>O<sub>2</sub> catalyzed by a 1,3,2-oxazaphosphole as flavin mimic.**

István Bors, József Kaizer and Gábor Speier\*

*Department of Chemistry, University of Pannonia, H-8200 Veszprém, Hungary*  
[speier@almos.uni-pannon.hu](mailto:speier@almos.uni-pannon.hu)

**Kinetics**

The method of Hiatt et al.<sup>1</sup> was adopted. The  $\lambda_{\max}$  value for PPh<sub>3</sub> is 260 ( $\epsilon = 14000 \text{ M cm}^{-1}$ ) nm. That of OPPh<sub>3</sub> is 260 nm with  $\epsilon = 2200 \text{ M cm}^{-1}$ . Because of the almost identical  $\lambda_{\max}$  of PPh<sub>3</sub> and OPPh<sub>3</sub> correction have to be made according to the following:

$$A = (\epsilon_{\text{PPh}_3} [\text{PPh}_3] + \epsilon_{\text{OPPh}_3} [\text{OPPh}_3]) l$$

$$[\text{PPh}_3] = [\text{PPh}_3]_0 - [\text{OPPh}_3]$$

where A is absorbance measured, l the pathway of the cuvette and  $[\text{PPh}_3]_0$  the starting concentration in  $\text{mol dm}^{-3}$ .

1 R. Hiatt, R. J. Smythe and C. McColeman, *Can. J. Chem.* 1971, **49**, 1707-1711.

**Figure 1.** The dioxygen uptake of 2,2-dihydro-2,2,2-triphenylphenanthro [9,10-d]1,3,2λ<sup>5</sup>-oxazaphosphole (**3**) 1.06 mmol in 10 ml acetonitrile at 20°C and 1 bar O<sub>2</sub> pressure.

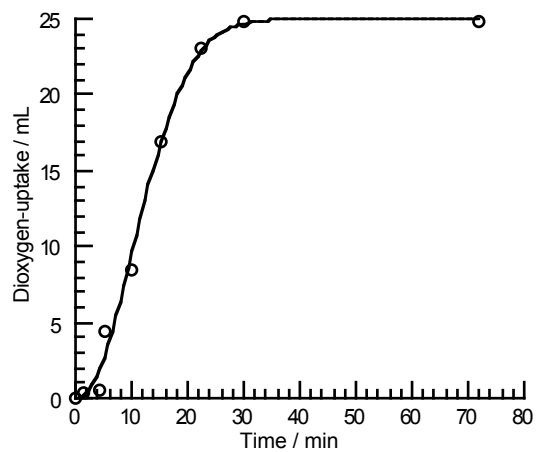

**Figure 2.** The dependence of O<sub>2</sub>-uptake of **3** on the solvents. Conditions: Solvent 20 mL, 1,3,2-oxazaphosphole (**3**) 0.25 mmol, 25°C, 1 bar O<sub>2</sub> pressure.

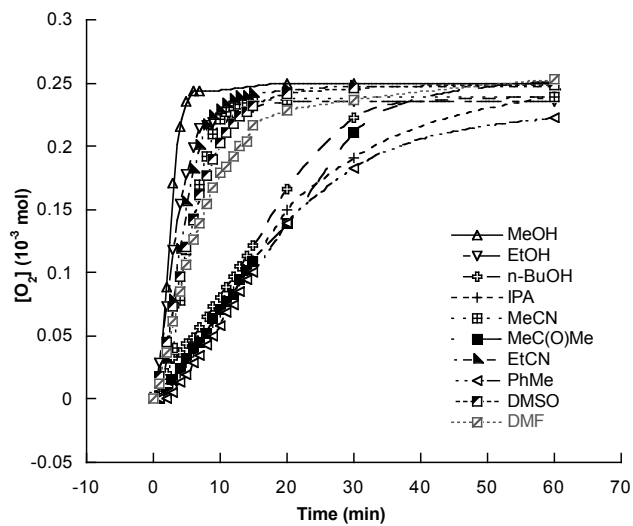

**Figure 3.** The time course of the PPh<sub>3</sub> oxygenation followed by UV-Vis spectroscopy at 260 nm, 80°C, 1 bar O<sub>2</sub> pressure in DMF 20 mL.

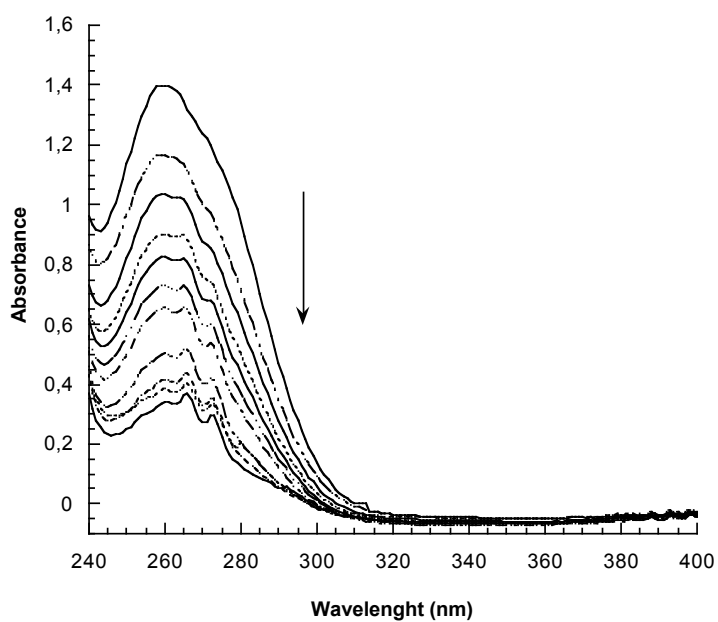

**Figure 4.** Plot of reaction rate vs. the initial concentration of  $\text{PPh}_3$ .

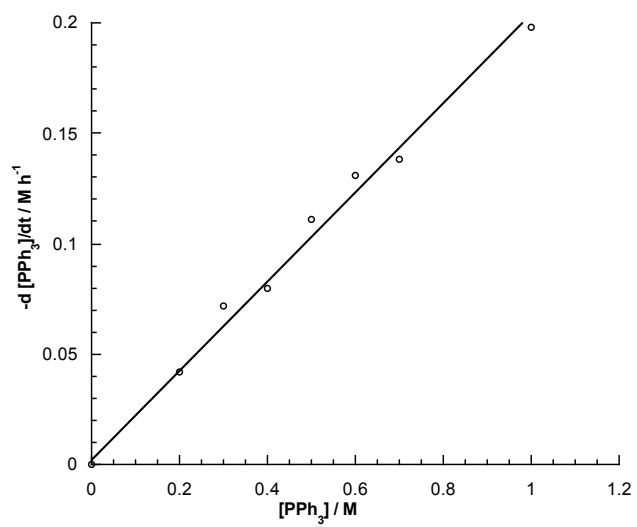

**Figure 5.** The dependence of the reaction rate of the catalyst concentration [3].

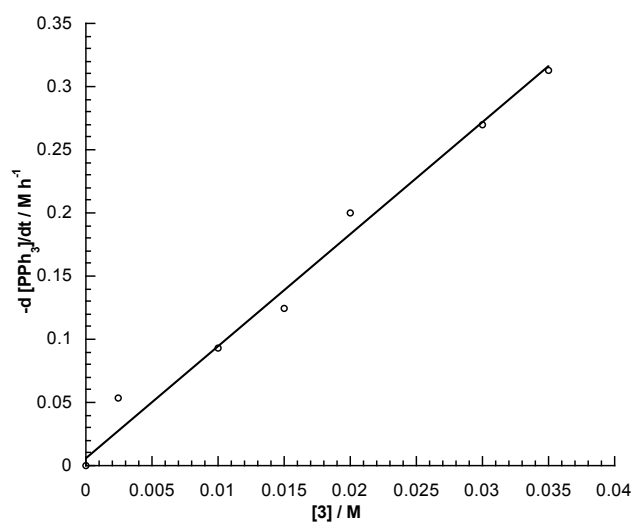

**Figure 6.** The dependence of the reaction rate on the dioxygen concentration.

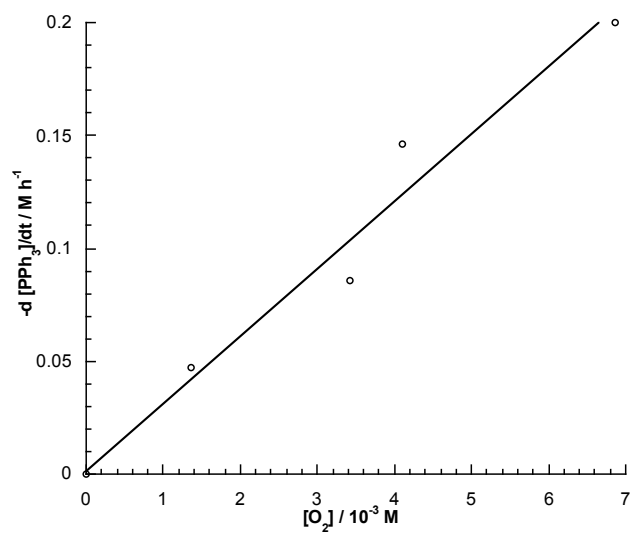

**SFigure 7.** The IR spectra of the reaction product O=PPh<sub>3</sub> using <sup>16</sup>O<sub>2</sub> or <sup>18</sup>O<sub>2</sub>.

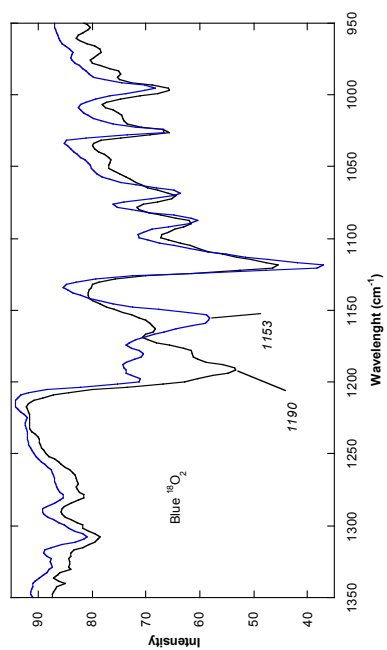



**Figure 8.** UV-Vis spectra of the reaction of **7** with  $\text{KO}_2$ .

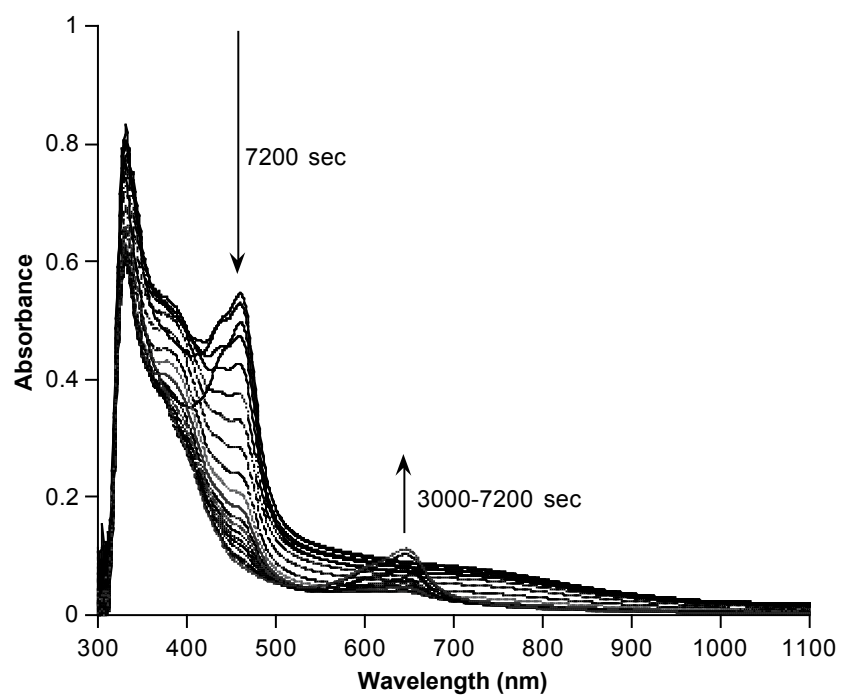

**SFigure 9.** The effect of added  $\text{NEt}_3$  on the reaction rate.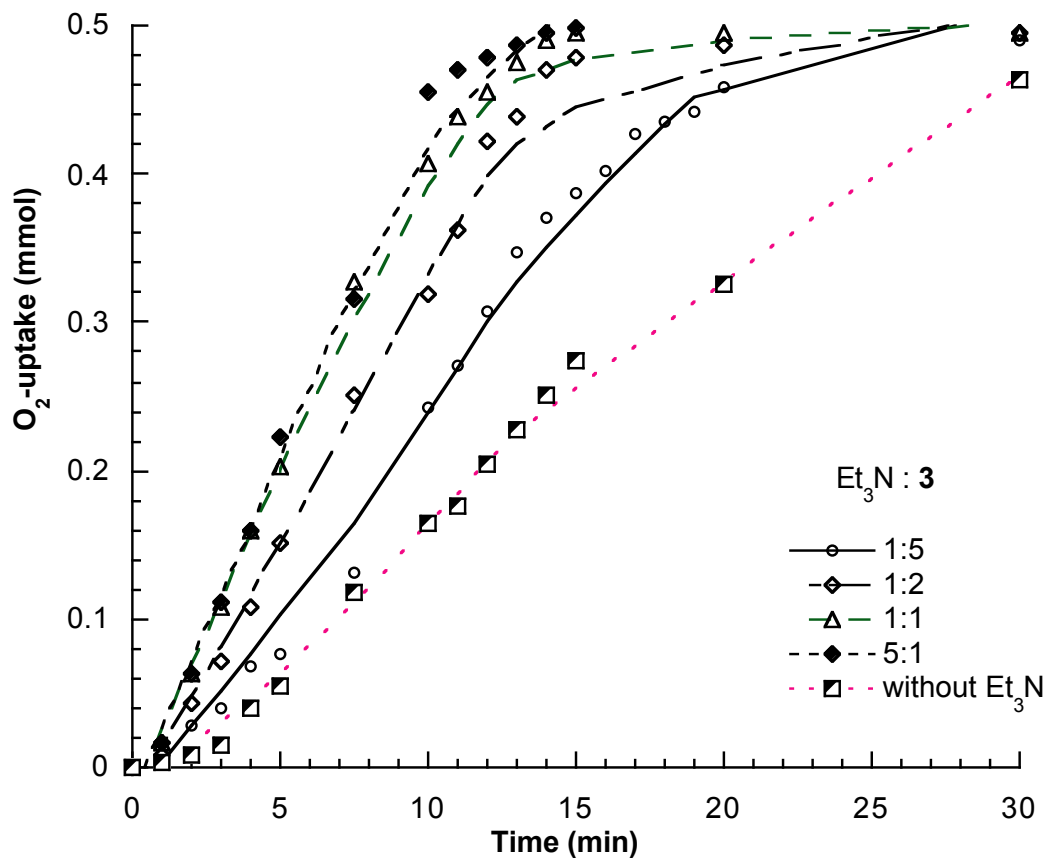

**Figure 10.** The IR spectra of the reaction product (red) of 9,10-phenanthrenequinone oxim (green) and  $\text{PPh}_3$ . The 9,10-phenanthrenequinone imine (black) is also shown. The  $\nu(\text{P}=\text{O})$  vibrations of  $\text{OPPh}_3$  are not shown.

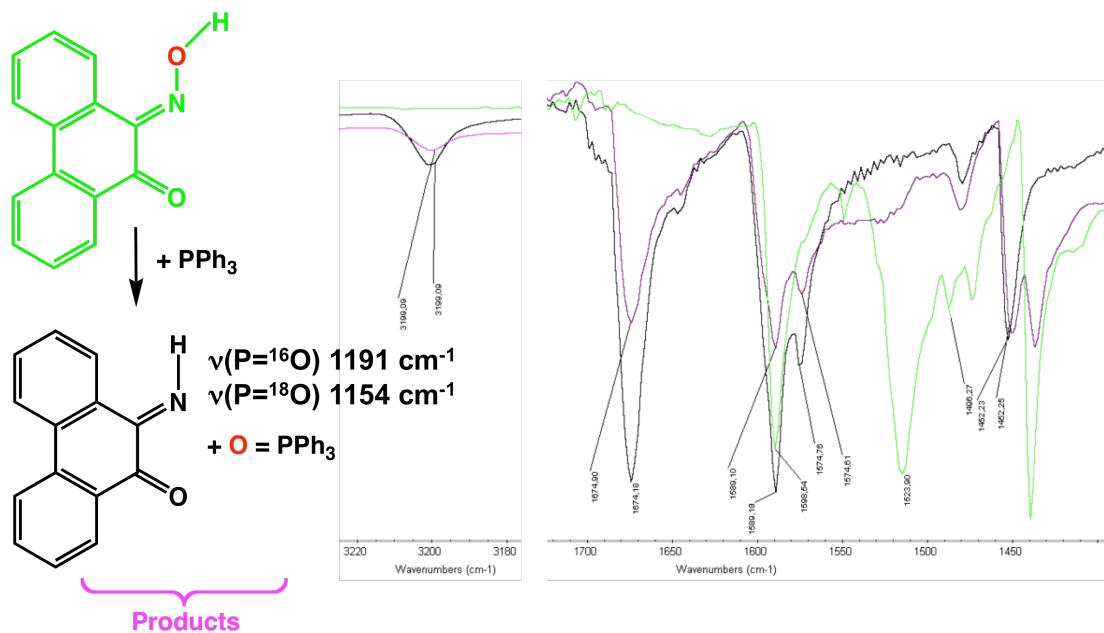

**Figure 11.** The Arrhenius plot.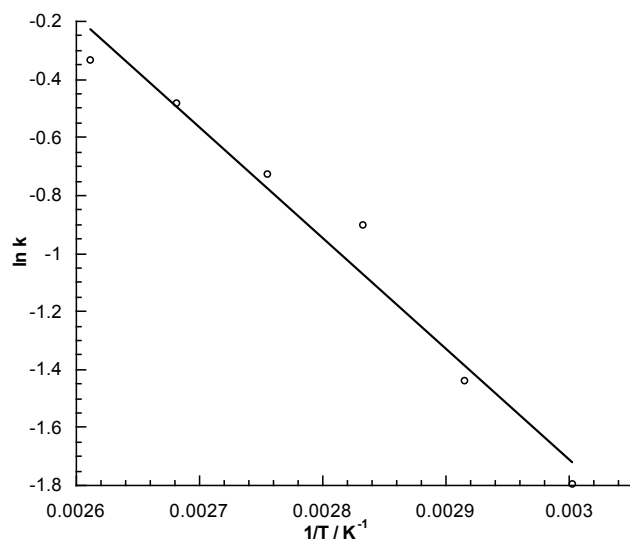

**Figure 12.** The Eyring plot.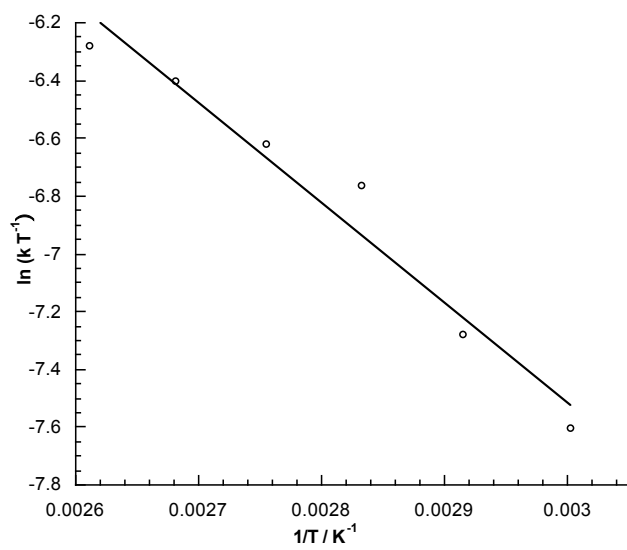

**STable 1.** Summary of the kinetic data.

| Entry     | T<br>(K) | [O <sub>2</sub> ]<br>(10 <sup>-3</sup> M) | [PPh <sub>3</sub> ]<br>(M) | [cat]<br>(10 <sup>-2</sup> M) | d[PPh <sub>3</sub> ]/dt<br>(10 <sup>-5</sup> s <sup>-1</sup> ) | <i>k</i> <sub>obs</sub><br>(10 <sup>-1</sup> M <sup>-2</sup> s <sup>-1</sup> ) |
|-----------|----------|-------------------------------------------|----------------------------|-------------------------------|----------------------------------------------------------------|--------------------------------------------------------------------------------|
| <b>1</b>  | 353      | 6.86                                      | 0.2                        | 2.00                          | 5.44±0.18                                                      | 3.97±0.13                                                                      |
| <b>2</b>  | 353      | 6.86                                      | 0.3                        | 2.00                          | 5.67±0.56                                                      | 4.13±0.41                                                                      |
| <b>3</b>  | 353      | 6.86                                      | 0.4                        | 2.00                          | 6.14±0.15                                                      | 4.47±0.11                                                                      |
| <b>4</b>  | 353      | 6.86                                      | 0.5                        | 2.00                          | 5.56±0.22                                                      | 4.05±0.16                                                                      |
| <b>5</b>  | 353      | 6.86                                      | 0.6                        | 2.00                          | 6.03±0.12                                                      | 4.39±0.09                                                                      |
| <b>6</b>  | 353      | 6.86                                      | 0.7                        | 2.00                          | 5.28±0.07                                                      | 3.85±0.05                                                                      |
| <b>7</b>  | 353      | 6.86                                      | 1.0                        | 2.00                          | 5.50±0.20                                                      | 4.01±0.14                                                                      |
| <b>8</b>  | 353      | 6.86                                      | 0.5                        | 1.00                          | 2.58±0.07                                                      | 3.77±0.10                                                                      |
| <b>9</b>  | 353      | 6.86                                      | 0.5                        | 1.50                          | 3.44±0.10                                                      | 3.35±0.10                                                                      |
| <b>10</b> | 353      | 6.86                                      | 0.5                        | 3.00                          | 7.47±0.75                                                      | 3.63±0.37                                                                      |
| <b>11</b> | 353      | 6.86                                      | 0.5                        | 3.50                          | 8.92±0.22                                                      | 3.71±0.09                                                                      |
| <b>12</b> | 353      | 1.37                                      | 0.5                        | 2.00                          | 1.31±0.19                                                      | 4.77±0.70                                                                      |
| <b>13</b> | 353      | 3.42                                      | 0.5                        | 2.00                          | 2.39±0.11                                                      | 3.49±0.16                                                                      |
| <b>14</b> | 353      | 4.10                                      | 0.5                        | 2.00                          | 3.78±0.19                                                      | 4.61±0.23                                                                      |
| <b>*</b>  |          |                                           |                            |                               |                                                                | <b>3.91±0.08</b>                                                               |
| <b>15</b> | 333      | 6.20                                      | 0.5                        | 2.00                          | 2.06±0.07                                                      | 1.66±0.06                                                                      |
| <b>16</b> | 343      | 6.56                                      | 0.5                        | 2.00                          | 3.11±0.15                                                      | 2.37±0.11                                                                      |
| <b>17</b> | 363      | 7.48                                      | 0.5                        | 2.00                          | 7.22±0.53                                                      | 4.83±0.35                                                                      |
| <b>18</b> | 373      | 7.70                                      | 0.5                        | 2.00                          | 9.53±0.40                                                      | 6.19±0.26                                                                      |
| <b>19</b> | 383      | 7.45                                      | 0.5                        | 2.00                          | 10.67±0.70                                                     | 7.16±0.47                                                                      |

\*Mean value of the kinetic constant *k*<sub>obs</sub> and its standard deviations  $\sigma(k_{\text{obs}})$  were calculated as  $k_{\text{obs}} = (\sum_i w_i k_i / \sum_i w_i)$  and  $\sigma(k_{\text{obs}}) = (\sum_i w_i (k_i - k_{\text{obs}})^2 / (n-1) \sum_i w_i)^{1/2}$ , where  $w_i = 1/\sigma_i^2$ .

### Activation parameters

$$E_a = 31.61 \pm 2.86 \text{ kJ mol}^{-1}$$

$$\Delta H^\ddagger = 28.67 \pm 2.88 \text{ kJ mol}^{-1}$$

$$\Delta S^\ddagger = -174 \pm 8 \text{ J mol}^{-1} \text{ K}^{-1}$$
